# Supplementary material
Source: PubMed Central journal article supplement (PMC10842527)

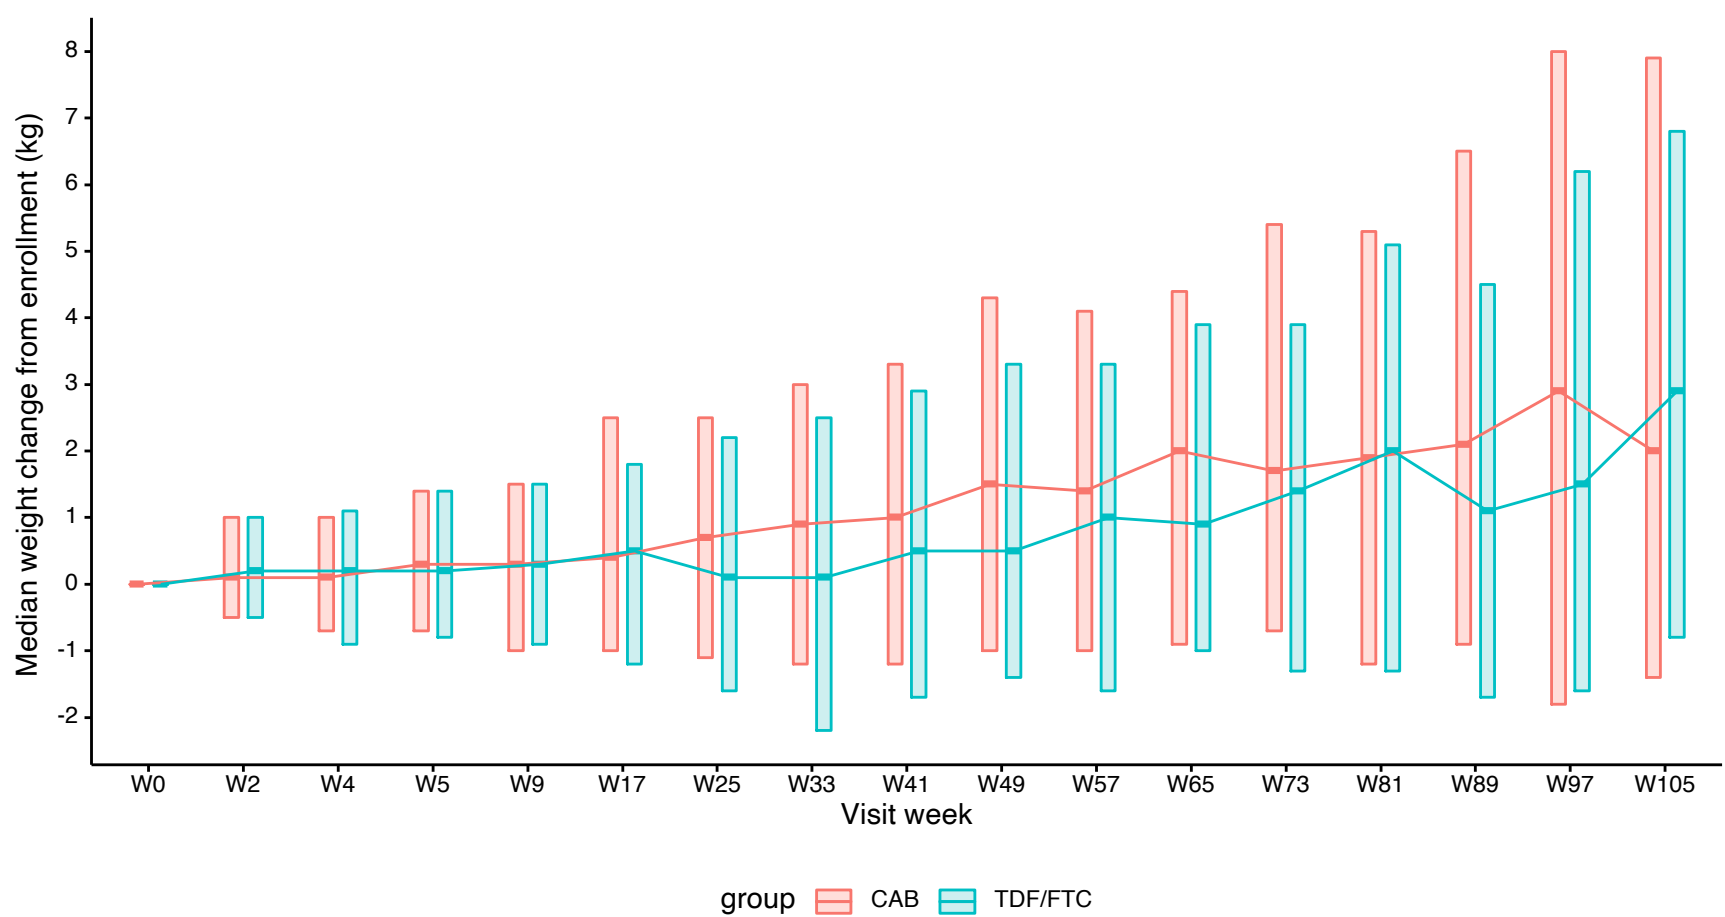

Supplement: NIHMS1936690-supplement-2.pdf [file NIHMS1936690-supplement-2.pdf]
